# Supplementary material
Source: Springer Nature journal article supplement (https://www.springermedizin.de/resource/supplementary/12885_2014_4793_MOESM2_ESM.pdf/9467288)

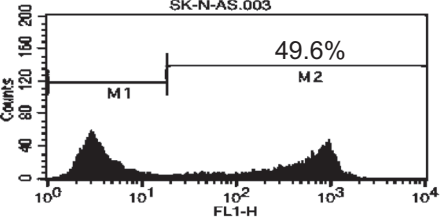

siCN

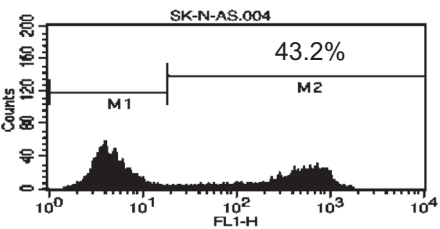

siGLI1

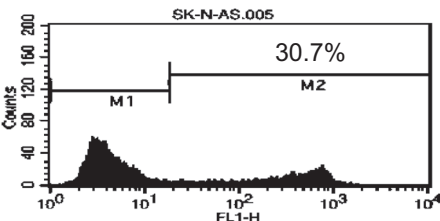

siS6K1

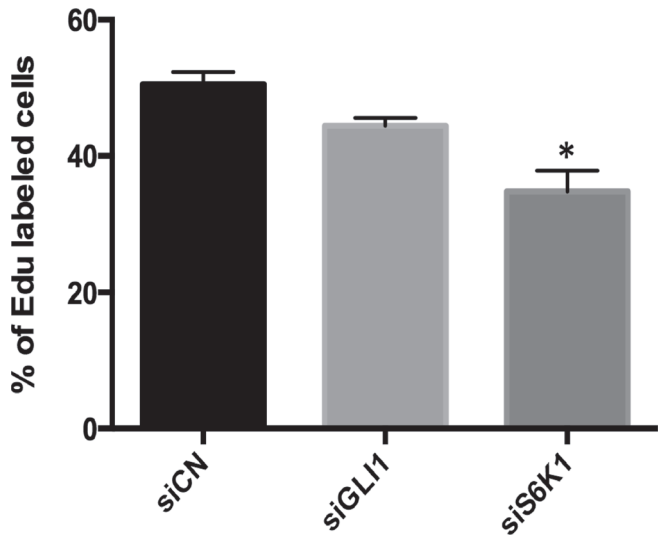

Supplement: MOESM2 [file 9467288]
